# Supplementary material for: A vector correlation study using a hexapole-oriented molecular beam: photodissociation dynamics of oriented isohaloethane
Source: Royal Society of Chemistry journal article supplement (doi:10.1039/d1cp05788j), 2022-01-01
Supplement: d1cp05788j1.pdf [file d1cp05788j1.pdf]

## Supporting Information:

### Vector correlation study using a hexapole-oriented molecular beam:

#### Photodissociation dynamics of oriented isohaloethane

Dock-Chil Che, Hiroshi Kawamata, Masaaki Nakamura, Toshio Kasai,

and King-Chuen Lin

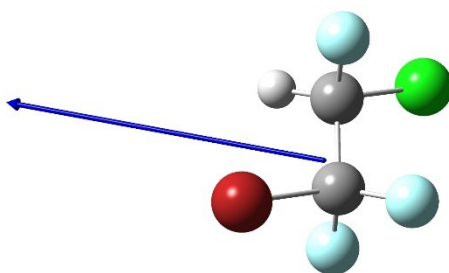

**Figure S-1:** Calculated molecular structure of isohaloethane obtained at the MP2/6-311+G(d,p) level of theory. The white, light blue, gray, green, and red spheres correspond to H, F, C, Cl, and Br atoms, respectively. The blue arrow indicates the direction of the dipole moment.

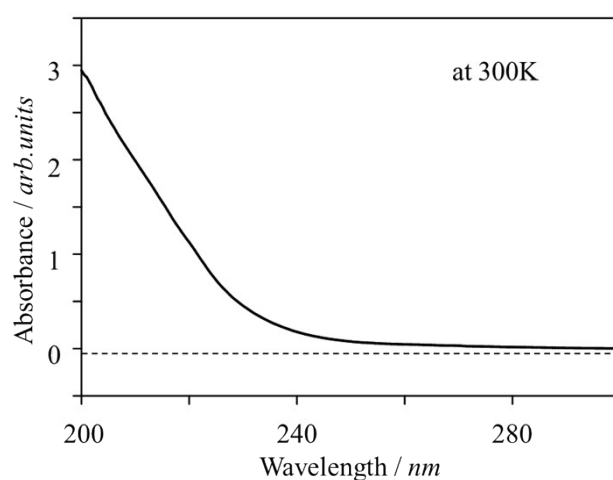

**Figure S-2:** Absorption spectrum of isohaloethane vapor at room temperature.
